# Supplementary material
Source: PubMed Central journal article supplement (PMC4054275)
Supplement: EC.00069-14_zek999094291so1.pdf [file EC.00069-14_zek999094291so1.pdf]

**TABLE S1. Primers used in this study.**

| Name   | Sequence                                  | Description                                                         |
|--------|-------------------------------------------|---------------------------------------------------------------------|
| B79    | TGTGGATGCTGGCGGAGGATA                     | Common screening primer on the <i>NAT</i> or <i>NEO</i> cassette    |
| B1026  | GTAAACGACGGCCAGTGAGC                      | M13F                                                                |
| B1027  | CAGGAAACAGCTATGACCATG                     | M13R                                                                |
| B1454  | AAGGTGTTCCCGACGACGAATCG                   | <i>NAT</i> split marker primer 1                                    |
| B1455  | AACTCCGTCGCGAGCCCACTCAAC                  | <i>NAT</i> split marker primer 2                                    |
| B1886  | TGGAAGAGATGGATGTGC                        | <i>NEO</i> split marker primer 1                                    |
| B1887  | ATTGTCTGTTGCGCCAG                         | <i>NEO</i> split marker primer 2                                    |
| B4017  | GCATGCAGGATTCGAGTG                        | Primer 1 for overexpression promoter with <i>NEO</i> marker         |
| B4018  | GTGATAGATGTGTTGTGGTG                      | Primer 2 for overexpression promoter with <i>NEO</i> marker         |
| B354   | GCATGCAGGATTCGAGTG                        | Primer 1 for <i>GFP</i> gene amplification                          |
| B5665  | GGTGGCGGTGGCTCTGTGAGC                     | Primer 2 for <i>GFP</i> gene amplification                          |
| B3656  | TTTGAGGATTCAGGAGTGCC                      | Primer L1 for the left flanking region of <i>PTP1</i>               |
| B3657  | TCACTGGCCGTCGTTTTACTTGTGAAGCAGCGAATACTC   | Primer L2 for the left flanking region of <i>PTP1</i>               |
| B3658  | CATGGTCATAGCTGTTTCTGTGCGTTCCTGAAAGTGCCC   | Primer R1 for the right flanking region of <i>PTP1</i>              |
| B3659  | GTGATGATTTGCTCGTCG                        | Primer R2 for the left flanking region of <i>PTP1</i>               |
| B3655  | TTGACAGGTGACTGGAAGG                       | Screening primer to detect <i>PTP1</i> deletion, pairing with B79   |
| B3660  | TCCATCTGTTACCACATTGG                      | <i>PTP1</i> probe primer 1 for Southern blot                        |
| J13644 | TTTCTTGCCTGGGTTTG                         | Primer L1 for the left flanking region of <i>PTP2</i>               |
| J13645 | CTGGCCGTCGTTTTACCTTTTCTATTCCAGCCCG        | Primer L2 for the left flanking region of <i>PTP2</i>               |
| J13646 | GTCATAGCTGTTTCTGCATAACAGTCATCATCCCTAC     | Primer R1 for the right flanking region of <i>PTP2</i>              |
| J13647 | TAGTTTCTGCCCTTACCGG                       | Primer R2 for the left flanking region of <i>PTP2</i>               |
| J13648 | CATTCAAACCTCGGCGTAG                       | Screening primer to detect <i>PTP2</i> deletion, pairing with B79   |
| J13649 | ATAGGCAGTCCTTTTCGC                        | <i>PTP2</i> probe primer 1 for Southern blot                        |
| J13650 | GAGGACGAAATCTACGGTTC                      | <i>PTP2</i> probe primer 2 for Southern blot                        |
| B3656  | TTTGAGGATTCAGGAGTGCC                      | <i>PTP1</i> left flanking primer for complementation                |
| B3659  | GTGATGATTTGCTCGTCG                        | <i>PTP1</i> right flanking primer for complementation               |
| B3756  | GCTTCCATCGAAACATAG                        | <i>PTP1</i> probe primer 1 for Northern blot                        |
| B3757  | CGAATGTTGCTACAGTCTTG                      | <i>PTP1</i> probe primer 2 for Northern blot                        |
| B2895  | CGCAAGCTTGATACGCCATAGTCCGAACGA            | <i>PTP2</i> left flanking primer for complementation                |
| B2896  | CGCAAGCTTAGCGGCTCTTGATCGGCC               | <i>PTP2</i> right flanking primer for complementation               |
| B2897  | GTGGAACCAAGGGTGTTC                        | Sequencing primer 1 for <i>PTP2</i>                                 |
| B2898  | ATCGTCTGGCTTCTCTTG                        | Sequencing primer 2 for <i>PTP2</i>                                 |
| B2899  | TTCCCTCTACTGCTTCG                         | Sequencing primer 3 for <i>PTP2</i>                                 |
| B2900  | CCTATGACTACTGCTGTACCG                     | Sequencing primer 4 for <i>PTP2</i>                                 |
| B2901  | CGATTACATCAACGCATCC                       | Sequencing primer 5 for <i>PTP2</i>                                 |
| B2902  | AGCATTCAACCTCTCTGG                        | Sequencing primer 6 for <i>PTP2</i>                                 |
| B2903  | ATGTTCTTTCTGTGGGCTC                       | Sequencing primer 7 for <i>PTP2</i>                                 |
| B3660  | TCCATCTGTTACCACATTGG                      | 5' RACE primer 1 for <i>PTP1</i>                                    |
| B3661  | GCATTGAGGGAGTTAGTAAAGG                    | 3' RACE primer 1 for <i>PTP1</i>                                    |
| B3095  | AGTATGCGAGTCCAGCGTATGTC                   | 5' RACE primer 1 for <i>PTP2</i>                                    |
| B3096  | GACCCAATCCCTCTCTTTACAG                    | 5' RACE primer 2 for <i>PTP2</i>                                    |
| B3365  | GCGTGACCCAGTGTGCTGTGTTCTTG                | 3' RACE primer 1 for <i>PTP2</i>                                    |
| B3366  | GCGATTGGGTCACTCGGGTCATTAGG                | 3' RACE primer 2 for <i>PTP2</i>                                    |
| B3758  | TTTTCTGTTCCCAAGCCGTC                      | <i>PTP2</i> probe primer 1 for Northern blot                        |
| B3759  | AAACCTTTCTGAGCACCCGC                      | <i>PTP2</i> probe primer 2 for Northern blot                        |
| B3655  | TTGACAGGTGACTGGAAGG                       | Left flanking primer 1 for overexpression of <i>PTP1</i>            |
| B5059  | cactggaactcctgatcTAGATTACAGTCCCGCCTC      | Left flanking primer 2 for overexpression of <i>PTP1</i>            |
| B5060  | accacaacacatctatcacATGGCTTCCATCGCAACATAG  | Right flanking primer 1 for overexpression of <i>PTP1</i>           |
| B3764  | CAATGAAAGTTCCAAGTCCG                      | Right flanking primer 2 for overexpression of <i>PTP1</i>           |
| B5685  | AAGTTGCTGATTGGACCC                        | Screening primer to detect H3 promoter insertion, pairing with B79  |
| B3656  | TTTGAGGATTCAGGAGTGCC                      | <i>PTP1</i> overexpression probe primer 1 for Southern blot         |
| B3660  | TCCATCTGTTACCACATTGG                      | <i>PTP1</i> overexpression probe primer 2 for Southern blot         |
| B4470  | GACGACGAAACGAATGACGG                      | Left flanking primer 1 for overexpression of <i>PTP2</i>            |
| B5061  | cactggaactcctgatcTCGTGATTAGCAAGCCGTG      | Left flanking primer 2 for overexpression of <i>PTP2</i>            |
| B5062  | accacaacacatctatcacATGGTTCGACAAAGTCCCCCGA | Right flanking primer 1 for overexpression of <i>PTP2</i>           |
| B3759  | AAACCTTTCTGAGCACCCGC                      | Right flanking primer 2 for overexpression of <i>PTP2</i>           |
| J13644 | TTTCTTGCCTGGGTTTG                         | Screening primer to detect H3 promoter insertion, pairing with B79  |
| B3758  | TTTTCTGTTCCCAAGCCGTC                      | <i>PTP2</i> overexpression probe primer 1 for Southern blot         |
| B3759  | AAACCTTTCTGAGCACCCGC                      | <i>PTP2</i> overexpression probe primer 2 for Southern blot         |
| B5671  | GCGGCCGCTTTGGAGGTTCAGGAGTGCC              | Left flanking primer 1 for <i>PTP1:GFP</i> strain                   |
| B5672  | GCGGCCGCTTGCAATCGTACAGAAGCT               | Right flanking primer 1 for <i>PTP1:GFP</i> strain                  |
| B2902  | AGCATTCAACCTCTCTGG                        | Left flanking primer 1 for <i>PTP2:GFP</i> strain                   |
| B5924  | GCTCACAGAGCCACCGCCTCTTTAATCTCCGCTAC       | Left flanking primer 1 for <i>PTP2:GFP</i> strain                   |
| B5925  | GCCACTCGAATCCTGATGCAAAAGGAATTGACCGTCTAG   | Right flanking primer 1 for <i>PTP2:GFP</i> strain                  |
| J13647 | TAGTTTCTGCCCTTACCGG                       | Right flanking primer 1 for <i>PTP2:GFP</i> strain                  |
| B2903  | ATGTTCTTTCTGTGGGCTC                       | <i>PTP2</i> probe primer 1 for <i>PTP2:GFP</i> strain Southern blot |
| B678   | TTCAGGGAACCTGGGAACAGC                     | <i>ERG11</i> probe primer 1 for Northern blot                       |
| B1598  | CAGGAGCAGAAACAAAAGC                       | <i>ERG11</i> probe primer 2 for Northern blot                       |
| B1894  | TTTTACGCTTTTTCAGATTCCGCCAAA               | Mating pheromone probe primer 1 for Northern blot                   |
| B1895  | GACCACTGTTTCTTCTGTTCT                     | Mating pheromone probe primer 2 for Northern blot                   |

Figure S1 (Lee et al. 2014)

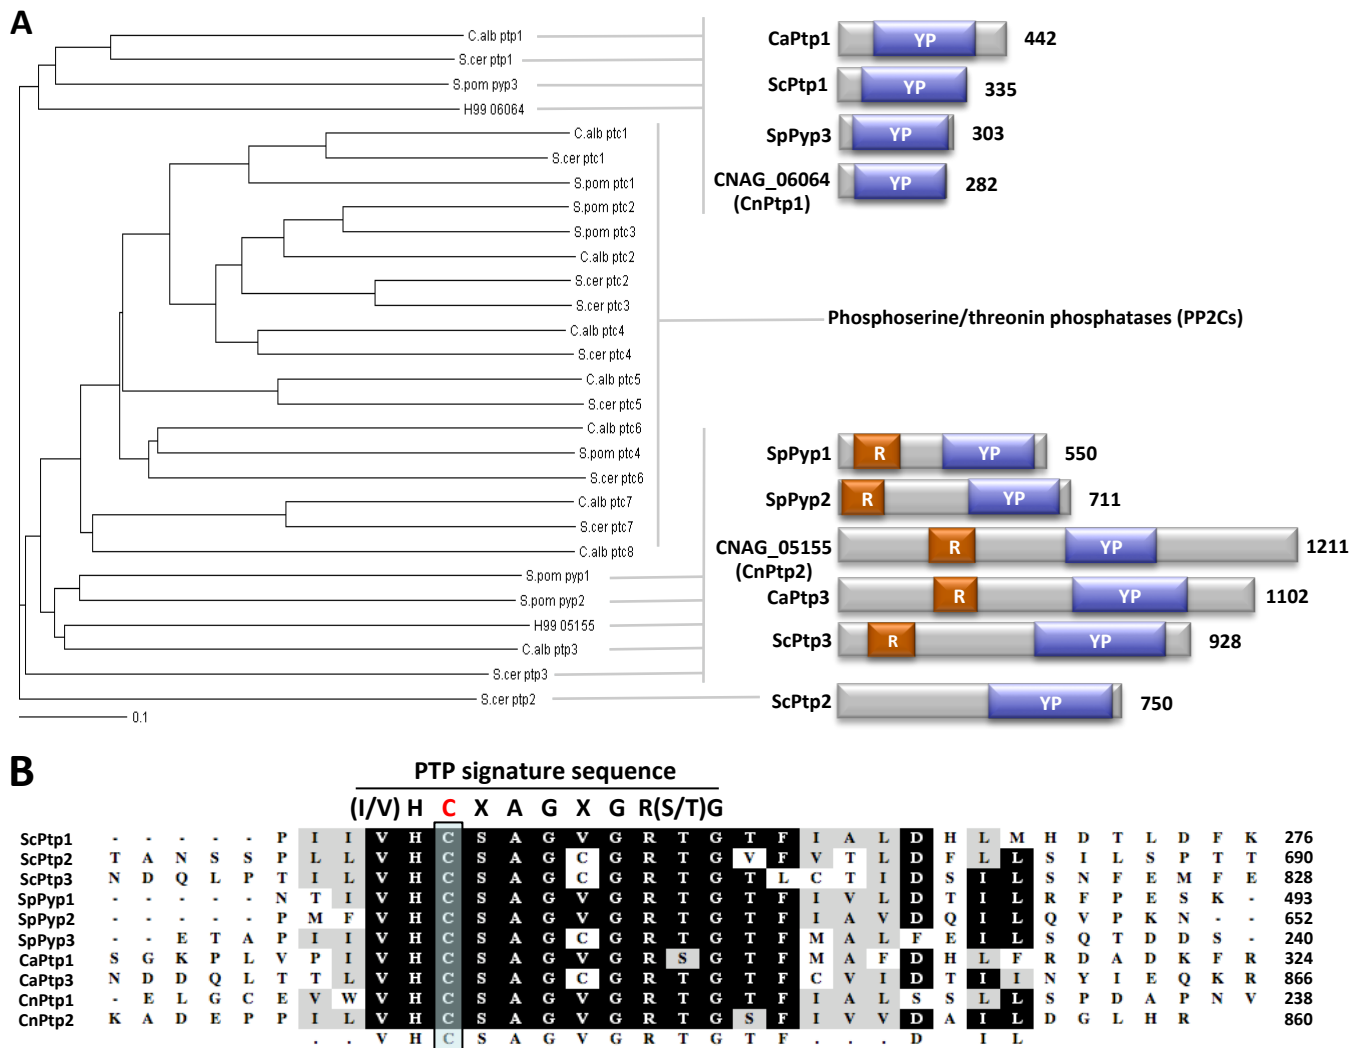

Fig S1: Protein tyrosine phosphatases, Ptp1 and Ptp2, in *C. neoformans*. (A) Phylogenetic tree of protein Tyr phosphatases (PTPs) and protein Ser/Thr phosphatases (PP2Cs) in *C. neoformans* and other fungi. The phylogenetic tree was generated by the philodendron phylogenetic tree printer (<http://iubio.bio.indiana.edu/treeapp/treeprint-form.html>). The scale bar line represents an evolutionary distance of 0.1. Protein sequences were retrieved from the following database: *C. neoformans* Ptp1: CNAG\_06064, Ptp2: CNAG\_05155 from the *C. neoformans* var. *grubii* H99 database of the Broad Institute (<http://www.broadinstitute.org>), *S. cerevisiae* Ptp1: YDL230W, Ptp2: YOR208W, Ptp3: YER075C, Ptc2: YER089C, Ptc3: YBL056W, Ptc4: YBR125C, Ptc5: YOR090C, Ptc6: YCR079W, Ptc7: YHR076W from the *Saccharomyces* genome database (<http://www.yeastgenome.org/>), *C. albicans* Ptp1: orf19.6365, Ptp3: orf19.7610, Ptc1: orf19.4785, Ptc2: orf19.2538, Ptc4: orf19.6638, Ptc5: orf19.6376, Ptc6: orf19.3705, Ptc7: orf19.5661, Ptc8: orf19.4698 from the *Candida* genome database (<http://www.candidagenome.org/>), *S. pombe* Pyp1: SPAC26F1.10c, Pyp2: SPAC19D5.01, Pyp3: SPAC11E3.09, Ptc1: SPCC4F11.02, Ptc2: SPCC1223.11, Ptc3: SPAC2G11.07c, Ptc4: SPAC4A8.03c, from the *S. pombe* genome database (<http://www.pombase.org/>). The protein domains in PTPs predicted by Pfam ([pfam.sanger.ac.uk](http://pfam.sanger.ac.uk)) were illustrated on the right side of the phylogenetic tree. The R box represents a Rhodanese-like domain (PF00581) and the YP box represents a protein-tyrosine phosphatase domain (PF00102). (B) Comparison of PTP signature sequences. Multiple sequence alignment of yeast PTP signature sequences was depicted by Clustal W alignment from MacVector software (version 12.5.1, Accelrys).

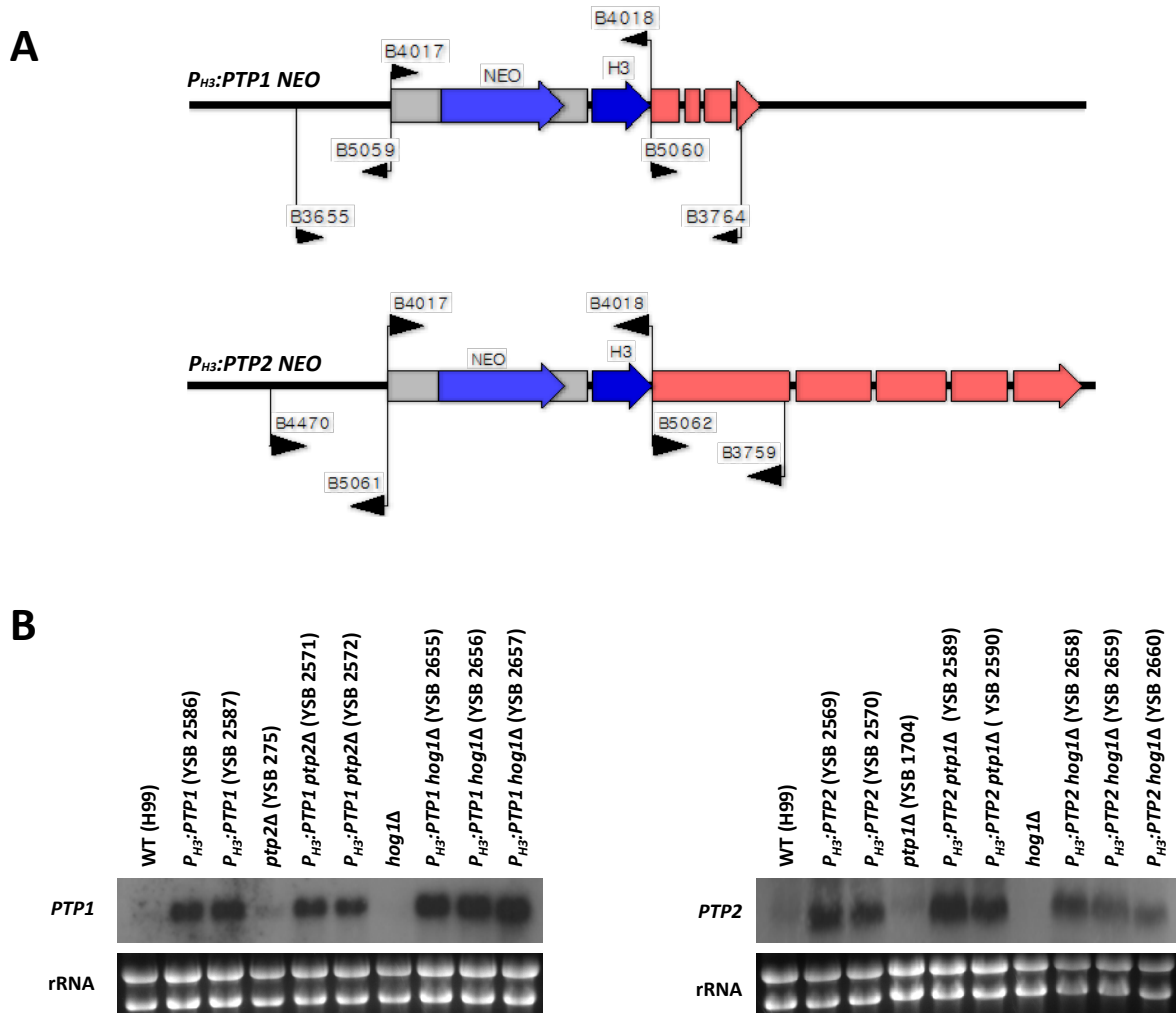

Fig S2: Construction of the constitutive *PTP1* or *PTP2* overexpression strains in *C. neoformans*. (A) The strategy for the construction of the *PTP1* or *PTP2* overexpression strains by using the constitutively active H3 promoter. (B) Northern blot analyses for measuring *PTP1* or *PTP2* expression in  $P_{H3}:PTP1$  or  $P_{H3}:PTP2$  strains, respectively. Ethidium bromide staining results of rRNA were used as loading controls.

Figure S3 (Lee et al. 2014)

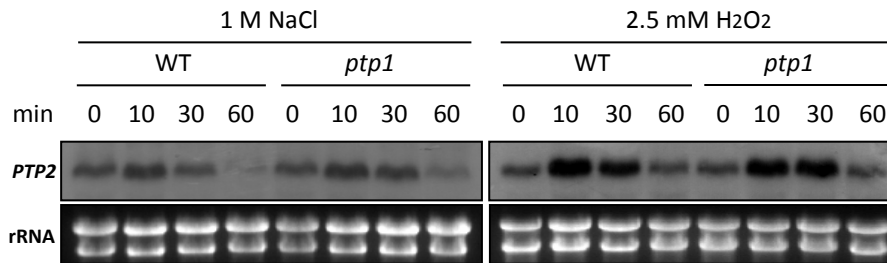

Fig S3: Ptp1 was not involved in expression levels of *PTP2*. Northern blot analysis using the total RNA isolated from each strain [WT (H99) and *ptp1* (YSB275)] grown to mid-logarithmic phase at 30°C in YPD medium and exposed to 1 M NaCl or 2.5 mM H<sub>2</sub>O<sub>2</sub>. Each membrane was hybridized with *PTP2* specific probes washed and developed. Ethidium bromide staining results of rRNA were used as loading controls.
